# Supplementary material for: Genomic Analysis of the Endangered Fonni’s Dog Breed: A Comparison of Genomic and Phenotypic Evaluation Scores
Source: MDPI journal article supplement (doi:10.3390/ani13050818), 2023-02-23
Supplement: s1 [file s1]

**Table S1.** Scores and description for all the enrolled Fonni's dogs.

| Genomic score | Typicality score | Judges' score | Sex    | Coat colour    | White spotting | Hair texture | Tail      | Eye colour | Bite     | Secondary breed |
|---------------|------------------|---------------|--------|----------------|----------------|--------------|-----------|------------|----------|-----------------|
| 100%          | 100%             | 100%          | Female | Gray (ash)     | No             | Goat         | Tailed    | Amber      | Scissors |                 |
| 100%          | 80%              | 100%          | Female | Black          | No             | Goat         | Brachyure | Amber      | Scissors |                 |
| 100%          | 70%              | 100%          | Female | Black          | No             | Goat         | Brachyure | Amber      | Scissors |                 |
| 97%           | 80%              | 100%          | Male   | Gray (ash)     | No             | Goat         | Brachyure | Amber      | Pincer   |                 |
| 86%           | 100%             | 99%           | Female | Brindled honey | No             | Goat         | Brachyure | Amber      | Scissors |                 |
| 85%           | 90%              | 97%           | Male   | Gray           | No             | Goat         | Brachyure | Dark amber | Scissors |                 |
| 80%           | 100%             | 98%           | Female | Brindled honey | No             | Goat         | Tailed    | Amber      | Pincer   |                 |
| 75%           | 80%              | 98%           | Female | Gray (ash)     | Yes            | Goat         | Brachyure | Amber      | Pincer   |                 |
| 75%           | 60%              | 100%          | Female | Gray (ash)     | Yes            | Goat         | Brachyure | Amber      | Scissors |                 |
| 74%           | 70%              | 100%          | Female | Gray (ash)     | No             | Goat         | Brachyure | Amber      | Scissors |                 |
| 73%           | 30%              | 98%           | Male   | Brindled       | Yes            | Short        | Tailed    | Dark amber | Scissors | MARM            |
| 64%           | 60%              | 98%           | Male   | Gray (ash)     | No             | Goat         | Tailed    | Amber      | Scissors | MARM            |
| 62%           | 60%              | 100%          | Female | Gray (ash)     | Yes            | Goat         | Tailed    | Amber      | Scissors | MARM            |
| 61%           | 60%              | 100%          | Female | Gray (ash)     | No             | Goat         | Brachyure | Amber      | Scissors | SIPF/SIPR       |
| 58%           | 60%              | 95%           | Male   | Black          | No             | Woolly       | Tailed    | Amber      | Scissors | SIPF/SIPR       |
| 58%           | 50%              | 98%           | Female | Brindled       | No             | Short        | Tailed    | Amber      | Scissors | MARM            |
| 57%           | 70%              | 100%          | Male   | Gray (dark)    | Yes            | Goat         | Brachyure | Amber      | Scissors | MARM            |
| 56%           | 40%              | 100%          | Male   | White          | No             | Woolly       | Tailed    | Dark amber | Scissors | MARM            |
| 54%           | 60%              | 97%           | Female | Black          | No             | Woolly       | Brachyure | Dark amber | Scissors | SIPF/SIPR       |
| 50%           | 90%              | 98%           | Male   | Gray (ash)     | Yes            | Woolly       | Tailed    | Dark amber | Scissors | SIPF/SIPR       |
| 48%           | 40%              | 99%           | Female | Brindled       | Yes            | Short        | Tailed    | Dark amber | Scissors | MAST            |
| 45%           | 60%              | 94%           | Male   | Gray (light)   | No             | Woolly       | Brachyure | Dark amber | Overshot | MARM            |
| 45%           | 40%              | 94%           | Female | Honey          | Yes            | Woolly       | Brachyure | Black      | Scissors | MARM            |
| 44%           | 50%              | 97%           | Male   | Gray (ash)     | No             | Woolly       | Brachyure | Amber      | Pincer   | NMIT/CCIT       |
| 43%           | 50%              | 98%           | Female | Brindled honey | No             | Goat         | Brachyure | Amber      | Pincer   | NMIT/CCIT       |
| 43%           | 60%              | 99%           | Male   | Gray (ash)     | Yes            | Goat         | Brachyure | Amber      | Scissors | SIPF/SIPR       |
| 43%           | 40%              | 98%           | Female | Gray (ash)     | Yes            | Woolly       | Tailed    | Amber      | Scissors | MARM            |
| 30%           | 70%              | 91%           | Male   | Black          | No             | Goat         | Brachyure | Amber      | Scissors | MARM            |
| 28%           | 20%              | 86%           | Female | Brindled       | No             | Short        | Brachyure | Dark amber | Scissors | MARM            |
| 19%           | 10%              |               | Female | Brindled       | Yes            | Short        | Tailed    | Black      | Scissors | MARM            |

Secondary breed refers to the main cluster after the Fonni's dog's one (Q-value > 5%) identified in the admixture analysis: MARM = Maremma and the Abruzzi's sheepdog, SIPF/SIPR = cluster common to Segugio Italiano a Pelo Forte and Segugio Italiano a Pelo Raso; MAST = Mastiff.
